# Supplementary material
Source: PubMed Central journal article supplement (PMC2735443)
Supplement: NIHMS126433-supplement-01.pdf [file NIHMS126433-supplement-01.pdf]

**Supplementary Table 1. HDL<sub>3</sub> proteins identified by mass spectrometric analysis.**

| <b>IPI Number</b> | <b>Protein Name</b>                        | <b>Total Peptides Identified per Sample (SD)<sup>1</sup></b> | <b>Samples with Detectable Peptides<sup>2</sup></b> | <b>% Amino Acid Coverage (SD)<sup>3</sup></b> | <b>Average Protein Probability<sup>4</sup></b> |
|-------------------|--------------------------------------------|--------------------------------------------------------------|-----------------------------------------------------|-----------------------------------------------|------------------------------------------------|
| IPI00021841       | Apolipoprotein AI                          | 240.1 (42.7)                                                 | 18                                                  | 71.2 (13.7)                                   | 1.00                                           |
| IPI00022434       | Serum albumin                              | 68.9 (36.4)                                                  | 18                                                  | 46.9 (11.4)                                   | 1.00                                           |
| IPI00021854       | Apolipoprotein A-II                        | 44.3 (15.4)                                                  | 18                                                  | 68.9 (10.7)                                   | 1.00                                           |
| IPI00019399       | Serum amyloid A4                           | 21.9 (5.2)                                                   | 18                                                  | 46.1 (11.9)                                   | 1.00                                           |
| IPI00305457       | Alpha-1-antitrypsin                        | 14.3 (4.2)                                                   | 18                                                  | 21.5 (4.3)                                    | 1.00                                           |
| IPI00030739       | Apolipoprotein M                           | 13.4 (3.5)                                                   | 18                                                  | 23.0 (11.2)                                   | 1.00                                           |
| IPI00021857       | Apolipoprotein C-III                       | 12.7 (2.7)                                                   | 18                                                  | 27.8 (6.8)                                    | 1.00                                           |
| IPI00021856       | Apolipoprotein C-II                        | 11.6 (5.0)                                                   | 18                                                  | 42.3 (4.5)                                    | 1.00                                           |
| IPI00021842       | <b>Apolipoprotein E*</b>                   | 11.0 (4.0)                                                   | 18                                                  | 23.8 (8.5)                                    | 1.00                                           |
| IPI00006662       | Apolipoprotein D                           | 7.9 (2.2)                                                    | 18                                                  | 23.8 (6.3)                                    | 1.00                                           |
| IPI00478761       | Apolipoprotein A-IV                        | 7.1 (2.3)                                                    | 18                                                  | 16.5 (10.5)                                   | 1.00                                           |
| IPI00218732       | Paraoxonase 1                              | 5.3 (2.8)                                                    | 18                                                  | 16.1 (7.6)                                    | 0.99                                           |
| IPI00022331       | Phosphatidylcholine-sterol acyltransferase | 4.9 (2.8)                                                    | 18                                                  | 10.1 (3.8)                                    | 0.99                                           |
| IPI00186903       | Apolipoprotein L1                          | 4.2 (1.7)                                                    | 18                                                  | 9.1 (3.1)                                     | 0.99                                           |
| IPI00299435       | <b>Apolipoprotein F*</b>                   | 4.2 (1.6)                                                    | 18                                                  | 6.1 (2.2)                                     | 1.00                                           |
| IPI00022368       | Serum amyloid A                            | 4.7 (3.8)                                                    | 11                                                  | 32.8 (10.2)                                   | 1.00                                           |
| IPI00400826       | <b>Apolipoprotein J (Clusterin)*</b>       | 3.5 (1.6)                                                    | 11                                                  | 6.1 (3.4)                                     | 0.99                                           |
| IPI00022733       | <b>Phospholipid transfer protein*</b>      | 5.0 (1.8)                                                    | 6                                                   | 8.0 (6.3)                                     | 0.98                                           |
| IPI00452748       | Serum amyloid A1                           | 4.1 (2.1)                                                    | 8                                                   | 20.7 (7.6)                                    | 0.99                                           |
| IPI00022431       | Alpha-2-HS-glycoprotein                    | 1.8 (0.4)                                                    | 11                                                  | 5.4 (0.0)                                     | 0.98                                           |
| IPI00477597       | Haptoglobin-related protein                | 2.8 (1.3)                                                    | 5                                                   | 11.0 (5.0)                                    | 0.99                                           |
| IPI00418163       | Complement component C4B                   | 1.6 (0.8)                                                    | 11                                                  | 1.6 (0.5)                                     | 0.97                                           |
| IPI00298971       | Vitronectin                                | 3.0 (1.9)                                                    | 5                                                   | 5.7 (2.7)                                     | 0.99                                           |
| IPI00215894       | Kininogen                                  | 2.0 (0.0)                                                    | 4                                                   | 2.1 (0.0)                                     | 0.98                                           |
| IPI00298828       | Beta-2-glycoprotein I                      | 2.0 (0.0)                                                    | 2                                                   | 4.0 (0.1)                                     | 0.96                                           |
| IPI00164623       | Complement component C3                    | 2.0 (1.4)                                                    | 2                                                   | 2.1 (0.8)                                     | 0.99                                           |
| IPI00555812       | Vitamin D-binding protein                  | 1.5 (0.7)                                                    | 2                                                   | 4.9 (0.4)                                     | 0.96                                           |

Proteomic analysis of HDL<sub>3</sub> (d=1.10 to 1.21 g/mL) from six CAD subjects before and during niacin/statin therapy and six healthy control subjects (Table 1, Group 1).

\*Proteins differentially expressed as assessed by spectral counting and Student's paired *t*-test or by XIC peak area and a two-way repeated measures analysis-of-variance between pre- and post-niacin/statin treatment.

<sup>1</sup> Average number of total peptides identified in each sample (SD) for samples in which at least one peptide was detected.

<sup>2</sup> Number of samples in which at least one peptide was detected and the protein identified. A total of 18 samples were analyzed.

<sup>3</sup> Average percent of the total amino acid sequence of the protein detected by proteomic analysis.

<sup>4</sup> Average Protein Probability Score from ProteinProphet.

**Supplementary Table 2:** Peptides quantified by peak areas of extracted ion chromatograms from HDL<sub>3</sub> of CAD subjects before and during niacin/statin (N/S) therapy.

| Protein | Peptide Sequence                     | Precursor ion m/z | CAD AUCx10 <sup>-6</sup> (SD) | CAD+N/S AUCx10 <sup>-6</sup> (SD) |
|---------|--------------------------------------|-------------------|-------------------------------|-----------------------------------|
| ApoE    | LAVYQAGAR                            | 474.767           | 20.8 (4.92)                   | 15.9 (5.80)                       |
|         | AATVGSLAGQPLQER                      | 749.405           | 7.62 (2.74)                   | 4.18 (2.39)                       |
|         | GEVQAMLFQSTEELRVR <sup>1</sup>       | 665.011           | 8.30 (1.30)                   | 4.41 (2.42)                       |
|         | LKSWFEPLVEDMQR <sup>1</sup>          | 593.303           | 9.39 (4.06)                   | 5.66 (2.67)                       |
|         | LGPLVEQGR                            | 484.770           | 42.4 (7.50)                   | 33.1 (14.8)                       |
|         | VQAAVGTSAAPVPSDNH                    | 810.902           | 2.24 (2.21)                   | 0.83 (0.47)                       |
|         | AYKSELEEQLTPVAEETR <sup>1</sup>      | 698.351           | 1.96 (0.72)                   | 1.10 (0.83)                       |
| ApoF    | SGVQQLIQYYQDQK <sup>1</sup>          | 566.621           | 1.52 (0.79)                   | 3.11 (1.41)                       |
|         | SYDLDPGAGSLEI                        | 668.817           | 11.2 (3.01)                   | 18.73 (6.40)                      |
| ApoJ    | LFSDPITVTVPVEVSR                     | 937.499           | 0.89 (0.58)                   | 2.49 (1.50)                       |
|         | VTTVASHTSDSDVPSGVTEVVVK <sup>1</sup> | 772.064           | 0.78 (0.57)                   | 2.49 (1.79)                       |
| PLTP    | TMLQIGVMPMLNER                       | 816.917           | 0.06 (0.05)                   | 0.31 (0.19)                       |
|         | AGALQLLLVGDK <sup>2</sup>            | 599.363           | 0.16 (0.11)                   | 0.42 (0.30)                       |
|         | SSVDELVGIDYSLMK <sup>1</sup>         | 552.611           | 0.15 (0.09)                   | 0.51 (0.40)                       |
|         | ATYFGSIVLLSPAVIDSPLK <sup>1</sup>    | 697.729           | 0.46 (0.34)                   | 1.25 (1.19)                       |
| ApoC-II | TYLPAVDEKLRDLYSK                     | 956.015           | 18.6 (2.60)                   | 13.1 (5.02)                       |
|         | STAAMSTYTGIFTDQVLSVLKGEE             | 1274.628          | 69.3 (18.3)                   | 47.17 (21.0)                      |
|         | TAAQNLYEK                            | 519.267           | 1.18 (0.73)                   | 0.56 (0.13)                       |
| ApoA-I  | ATEHLSTLSEK                          | 608.314           | 23.4 (20.8)                   | 18.3 (17.2)                       |
|         | DSGRDYVVSQFEGSALGK <sup>1</sup>      | 605.955           | 760 (345)                     | 1079 (476)                        |
|         | LLDNWDSVTSTFSK                       | 806.896           | 1864 (729)                    | 2669 (1226)                       |
|         | DLATVYVDVLK <sup>2</sup>             | 618.348           | 129 (54.5)                    | 170 (37.9)                        |
|         | DYVSQFEGSALGK                        | 700.838           | 238 (122)                     | 359 (173)                         |
| ApoAII  | SKEQLTPLIK                           | 578.850           | 19.5 (5.47)                   | 18.8 (6.05)                       |
|         | SYFEKSKEQLTPLIK <sup>2</sup>         | 906.001           | 0.04 (0.03)                   | 0.06 (0.05)                       |
|         | EPCVESLVSQYFQTVTDYGK                 | 1176.041          | 9.12 (4.00)                   | 10.4 (2.73)                       |
| ApoCIII | TAKDALSSVQESQVAQQAR <sup>2</sup>     | 1009.019          | 5.12 (0.88)                   | 4.14 (1.16)                       |
|         | DALSSVQESQVAQQAR                     | 858.929           | 7.60 (2.40)                   | 6.41 (3.30)                       |
|         | GWVTDGFSSLK                          | 598.801           | 0.24 (0.16)                   | 0.31 (0.37)                       |
| Albumin | RHPDYSVLLLLR <sup>1</sup>            | 633.670           | 2.75 (1.67)                   | 3.71 (2.58)                       |
|         | RHPYFYAPELLFFAK <sup>1</sup>         | 489.953           | 1.46 (0.56)                   | 2.08 (1.39)                       |
|         | HPYFYAPELLFFAK <sup>1</sup>          | 581.636           | 0.20 (0.08)                   | 0.32 (0.22)                       |

<sup>1</sup>The extracted ion chromatogram was calculated from the 3+ ion on indicated peptides. <sup>2</sup> The extracted ion chromatogram was calculated from the sum of 2+ and 3+ ions with the precursor

m/z shown for the 2+ ion. For all other peptides, the extracted ion chromatogram was calculated from the 2+ ion.
